# Supplementary material for: Conductive Hearing Loss with Age—A Histologic and Audiometric Evaluation
Source: MDPI journal article supplement (doi:10.3390/jcm10112341), 2021-05-27
Supplement: s1 [file s1]

Supplemental Table S1

|              | IMJ        |           |            |           |            | ISJ        |           |           |           |           |
|--------------|------------|-----------|------------|-----------|------------|------------|-----------|-----------|-----------|-----------|
|              |            | Gender    |            | Side      |            |            | Gender    |           | Side      |           |
| Age          | Total      | Female    | Male       | Left      | Right      | Total      | Female    | Male      | Left      | Right     |
| 0-10         | 22         | 12        | 10         | 11        | 11         | 15         | 9         | 6         | 7         | 8         |
| 11-20        | 15         | 6         | 9          | 3         | 12         | 10         | 6         | 4         | 1         | 9         |
| 21-30        | 23         | 5         | 18         | 5         | 18         | 15         | 1         | 14        | 4         | 11        |
| 31-40        | 21         | 6         | 15         | 7         | 14         | 13         | 5         | 8         | 5         | 8         |
| 41-50        | 21         | 4         | 17         | 10        | 11         | 22         | 4         | 7         | 5         | 6         |
| 51-60        | 25         | 8         | 17         | 10        | 15         | 21         | 9         | 12        | 9         | 12        |
| 61-70        | 26         | 8         | 18         | 5         | 21         | 21         | 7         | 14        | 6         | 15        |
| <b>Total</b> | <b>153</b> | <b>49</b> | <b>104</b> | <b>51</b> | <b>102</b> | <b>106</b> | <b>41</b> | <b>65</b> | <b>37</b> | <b>69</b> |

Supplemental Table S2

| IMJ                         |               |                 |         |                    |
|-----------------------------|---------------|-----------------|---------|--------------------|
| Parameter                   | Mean $\pm$ SD | Median (Range)  | p-value | Age-related change |
| <i>Centerline Discus</i>    | 89 $\pm$ 43   | 85 (5 to 234)   | <0.001  | <i>Widening</i>    |
| <i>Peripheral Inc C tot</i> | 66 $\pm$ 23   | 61 (28 to 162)  | <0.001  | <i>Decrease</i>    |
| <i>Peripheral Inc cC</i>    | 42 $\pm$ 19   | 40 (13 to 128)  | 0.006   | <i>Decrease</i>    |
| <i>Peripheral Inc hC</i>    | 24 $\pm$ 9    | 22 (9 to 50)    | <0.001  | <i>Decrease</i>    |
| <i>Peripheral Discus</i>    | 60 $\pm$ 31   | 58 (4 to 167)   | <0.001  | <i>Widening</i>    |
| Centerline B-line           | 243 $\pm$ 67  | 232 (86 to 475) | 0.065   |                    |
| Centerline Mall C tot       | 81 $\pm$ 41   | 70 (26 to 255)  | 0.220   |                    |
| Centerline Inc C tot        | 73 $\pm$ 28   | 69 (26 to 161)  | 0.867   |                    |
| Centerline Mall cC          | 52 $\pm$ 36   | 41 (12 to 191)  | 0.125   |                    |
| Centerline Inc cC           | 47 $\pm$ 24   | 42 (11 to 130)  | 0.748   |                    |
| Centerline Mall hC          | 28 $\pm$ 14   | 25 (6 to 76)    | 0.298   |                    |
| Centerline Inc hC           | 26 $\pm$ 13   | 23 (7 to 89)    | 0.204   |                    |
| Peripheral B-line           | 195 $\pm$ 48  | 188 (99 to 342) | 0.721   |                    |
| Peripheral Mall C tot       | 69 $\pm$ 24   | 63 (29 to 169)  | 0.019   |                    |
| Peripheral Mall cC          | 45 $\pm$ 22   | 41 (15 to 147)  | 0.084   |                    |
| Peripheral Mall hC          | 24 $\pm$ 8    | 23 (8 to 48)    | 0.012   |                    |

Supplemental Table S3

| ISJ                       |               |                  |         |                    |
|---------------------------|---------------|------------------|---------|--------------------|
| Parameter                 | Mean $\pm$ SD | Median (Range)   | p-value | Age-related change |
| <i>Midline Stap C tot</i> | 83 $\pm$ 29   | 83 (25 to 166)   | <0.001  | <i>Increase</i>    |
| <i>Midline Stap cC</i>    | 59 $\pm$ 25   | 58 (15 to 133)   | 0.002   | <i>Increase</i>    |
| <i>Midline Inc hC</i>     | 34 $\pm$ 12   | 32 (9 to 77)     | 0.001   | <i>Decrease</i>    |
| <i>Postline Discus</i>    | 63 $\pm$ 43   | 58 (4 to 223)    | 0.009   | <i>Widening</i>    |
| Midline B-line            | 236 $\pm$ 60  | 230 (105 to 374) | 0.168   |                    |
| Midline Inc C tot         | 101 $\pm$ 38  | 92 (39 to 241)   | 0.195   |                    |
| Midline Inc cC            | 67 $\pm$ 38   | 60 (8 to 206)    | 0.788   |                    |
| Midline Stap hC           | 24 $\pm$ 13   | 23 (5 to 99)     | 0.182   |                    |
| Midline Discus            | 52 $\pm$ 29   | 46 (7 to 134)    | 0.120   |                    |
| Antline B-line            | 263 $\pm$ 59  | 261 (145 to 435) | 0.446   |                    |
| Antline Stap C tot        | 98 $\pm$ 33   | 97 (26 to 204)   | 0.082   |                    |
| Antline Inc C tot         | 120 $\pm$ 39  | 121 (42 to 220)  | 0.052   |                    |
| Antline Stap cC           | 71 $\pm$ 30   | 69 (13 to 161)   | 0.060   |                    |
| Antline Inc cC            | 85 $\pm$ 37   | 86 (13 to 176)   | 0.104   |                    |
| Antline Stap hC           | 27 $\pm$ 14   | 23 (4 to 68)     | 0.979   |                    |
| Antline Inc hC            | 35 $\pm$ 14   | 33 (12 to 74)    | 0.266   |                    |
| Antline Discus            | 45 $\pm$ 31   | 38 (4 to 137)    | 0.022   |                    |
| Postline B-line           | 280 $\pm$ 81  | 269 (101 to 515) | 0.140   |                    |
| Postline Stap C tot       | 100 $\pm$ 36  | 97 (33 to 244)   | 0.166   |                    |
| Postline Inc C tot        | 117 $\pm$ 45  | 119 (38 to 296)  | 0.593   |                    |
| Postline Stap cC          | 71 $\pm$ 32   | 69 (8 to 170)    | 0.068   |                    |
| Postline Inc cC           | 84 $\pm$ 45   | 81 (7 to 268)    | 0.983   |                    |
| Postline Stap hC          | 28 $\pm$ 14   | 25 (9 to 96)     | 0.978   |                    |
| Postline Inc hC           | 34 $\pm$ 13   | 33 (3 to 87)     | 0.018   |                    |
